# Supplementary material
Source: publisher figshare collection journal article supplement (https://geolsoc.figshare.com/ndownloader/files/14298995)
Supplement: Supplementary file 1 [file 14298995]

## Sheet: BrookSt
Ch. 4, Table S6 Point-count data
Sample	NZ13.143	N13.147	N13 155	NZ13-158	N13 159	N13.168	NZ13.171	N13 176	N14.93	N14-96	N14.97	N14.91	N14.92		N13 223	N13.233	N13.237	N13.239	N13.243	N13.245
rock type	sandstone	sandstone	sandstone	sandstone	sandstone	sandstone	sandstone	sandstone	sandstone	sandstone	sandstone	sandstone	sandstone		sandstone	sandstone	sandstone	sandstone	sandstone	sandstone
area	Redcliff Creek	Redcliff Creek	Redcliff Creek	Redcliff Creek	Redcliff Creek	Princhester Creek	Princhester Stream Creeek	Princhester stream			Elbow Creek area	Elbow Creek area	Elbow Creek area		Grampian Reserve	Grampian Reserve	Maitai R. (small quarry)	Maitai R. (small quarry)	Maitai R., Black Hole	Maitai R., Black Hole
stratigraphy	Brunel Formation	Brunel Formation	Brunel Formation	Brunel Formation	Brunel Formation	Elbow Formation	Elbow Formtion	Elbow Fm.	Caravan Formation	Caravan Formation	Caravan Formation	Barretts Formation	Barretts Formation		Grampian Formation	Grampian Formation	Grampian Formation	Grampian Formation	Grampian Formation	Grampian Formation
region	Takitimu Mtns.	Takitimu Mtns.	Takitimu Mtns.	Takitimu Mtns.	Takitimu Mtns.	Takitimu Mtns.	Takitimu Mtns.	Takitimu Mtns.	Waiaraki Hills	Waikiri Hills	Wairaki Hills	Wairaki Hills	Wairaki Hills		Nelson region	Nelson	Nelson	Nelson	Nelson	Nelson
GPS	S45 73006 E167 74524	S45 73016 E167 7447	S45 73016 E167 74447	S45 73016 E167 74447	S45 73016 E167 74447	S45 61211 E167 91676	S45 61264 E167 51516	S45 61264 E16791516	E21 19230 N54 79074	E21 17603 N54 78243	E21 17603 N54 78243	E21 18990 N54 78896	E21 18990 N54 78896		S41 29504 E173 28566	S41 29404 E173 28566	S41 27512 E173 30063	S41 27512 E173 30063	S41 27518 E173 32181	S41 28688 E173 33025
Microcrystalline quartz	0	0	1		0		0	0		2	1	13	0			26
Monocrystalline quartz	0	0		3	15	7	6	7	1	131	48	83	88		1	82	10	1	0	105
Polycrystalline quartz	3	0	1	32	10	8	0	4	1	22	14	31	15			112	29	16	32	84
Feldspar	160	119	60	111	36	27	142	28	112	99	75	38	88		31	22		130	26	56
Lithic fragments	137	181	238	154	239	258	152	261	186	46	162	135	109		268	58	261	153	242	55
Total	300	300	300	300	300	300	300	300	300	300	300	300	300		300	300	300	300	300	300

## Sheet: Murihiku
Sample	N13.28	N13.25	N14.13	N14.7	N14 3	N14.6	N14.216
Rock type	Murihiku, Thtroa, lower arc	Murihiku, Thtroa, lower arc	Murihiku, Thtroa, lower arc	Murihiku, Nugget point, lower arc	med. Sandstone	Murihiku, Nugget point, lower arc	Murihiku, Richmond, Champion Road
area					Nugget Point
stratigraphy					Murihiku Terrane
Region					E22 63855 N54 13085
GPS
Microcrystalline quartz	27	1	1	3	1	1
Monocrystalline quartz	86	99	40	74	140	95	33
Polycrystalline quartz	43	46	36	43	18	37	54
Feldspar	39	56	65	75	58	116	112
Lithic fragments	105	98	158	105	83	51	101
Total	300	300	300	300	300	300	300
